# Supplementary material
Source: PubMed Central journal article supplement (PMC1765476)

A

|         | J                           |
|---------|-----------------------------|
|         | 194 198                     |
| Bst-CCA | AHISVERMTMEMEKLLGGPFAARALP  |
| Ec-CCA  | EHLTPERVVKETESALTRRNQVVFQ   |
| Sc-CCA  | SKISRERVGVEMEKLLVGPTPLALQ   |
| Ce-CCA  | AGISAERIWTTELKKIVVGRMADEVLK |
| Hs-CCA  | AGISGERIWVELKKILVGNHVNHLIH  |
| Tm-CCA  | ERTTGPRLRQLEKILEEKNPLKSIR   |
| AaL-A   | KEAPRGRLINEIKLALREDRFLEILE  |
| SyL-A   | TPALTTRLKAELSILKAPYWKGALT   |
| Dr-A    | LADDTPLRWAEKLLLAEP RPQAAR   |
| AaS-CC  | LKSAVERITHELFFKIMKEKTAHKVIR |
| SyS-CC  | KTVAAEVQAEFNYLLGSPRGSQWLL   |
| Dr-CC   | PPFAWERVRDELHALLRSPDAARGIL  |
| Ec-PAP  | NDIPPARLFEESLKLQAGYG YETK   |
| Sf-PAP  | NDIPPARLFEESLKLQAGYG YETK   |
| St-PAP  | NDIPPARLFEESLKLQAGNGYETYQ   |
| Yp-PAP  | REIPPARLFEESLKLQSGYGKTYL    |
| Vc-PAP  | RDIPAARLYEESLKMQLQAGHGLEYH  |
| Hi-PAP  | KNIPPARLFDSESLKLQAGQGVKTYR  |
| Pa-PAP  | REIPSARLFDVSLKFLAGRAERTFE   |
| Xf-PAP  | ADVAPARLFEVSLKFLSGHAVVSFE   |
| Nm-PAP  | KHEPVARLFDSEIMKLLFSGHARECLK |

B

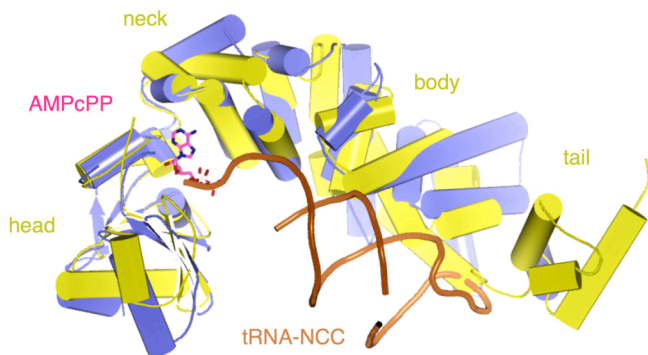

C

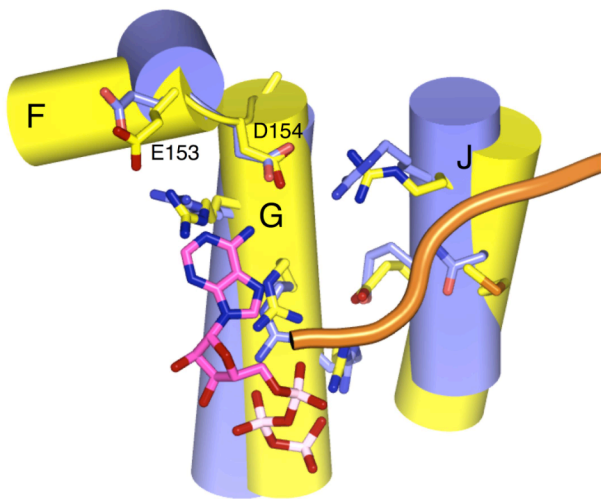

Supplement: pnas_0606961104_4.pdf [file pnas_0606961104_4.pdf]
