# Supplementary material
Source: PubMed Central journal article supplement (PMC1765476)

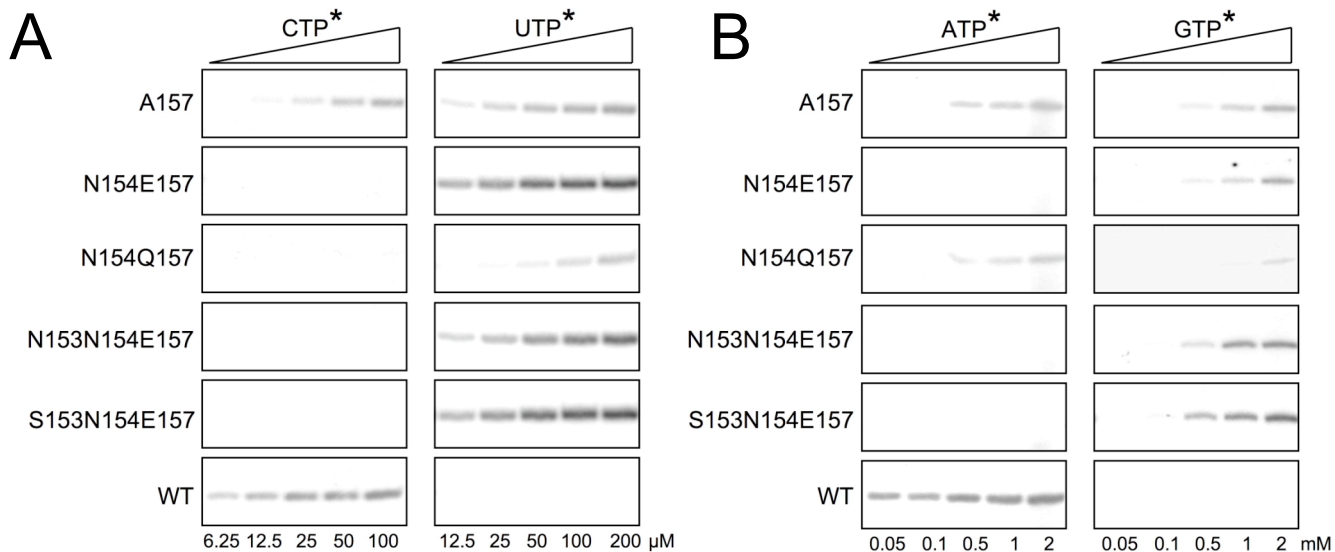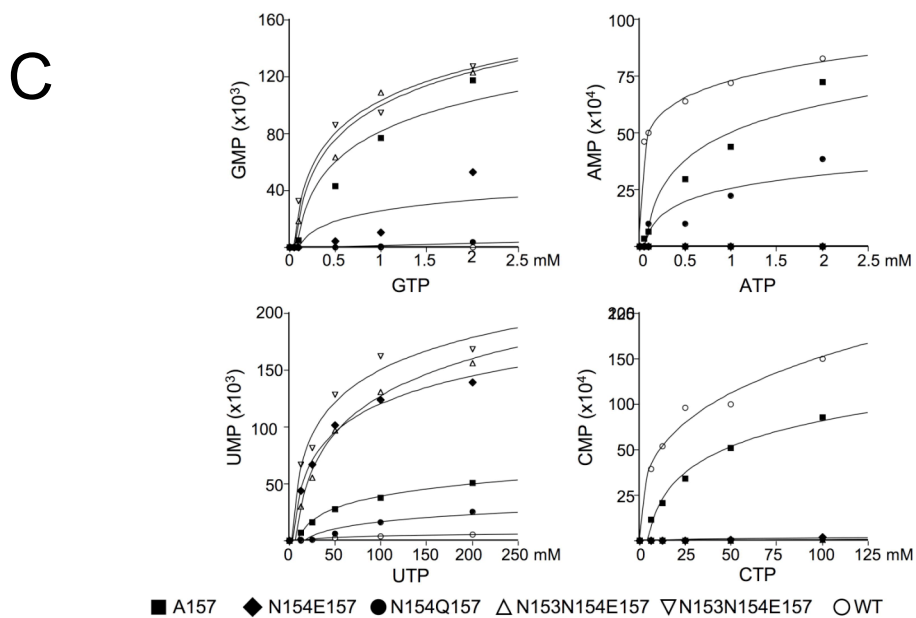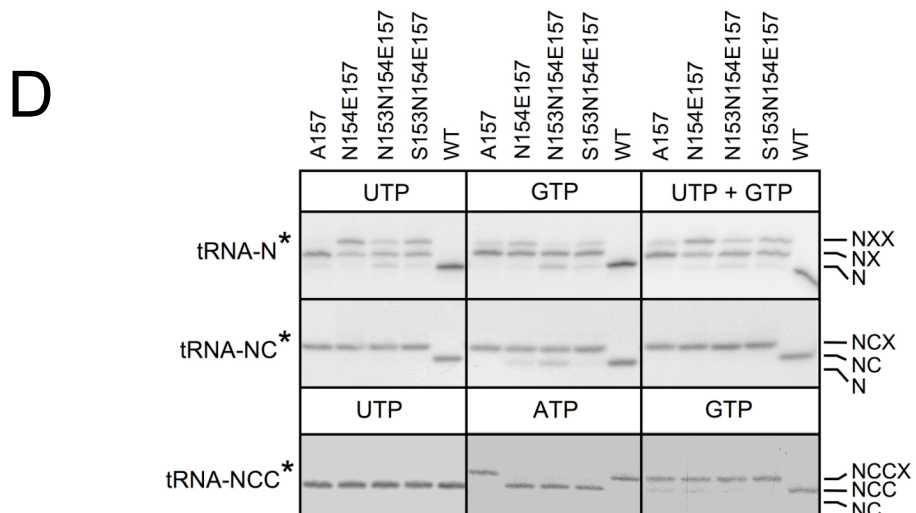

Supplement: pnas_0606961104_2.pdf [file pnas_0606961104_2.pdf]

**A**

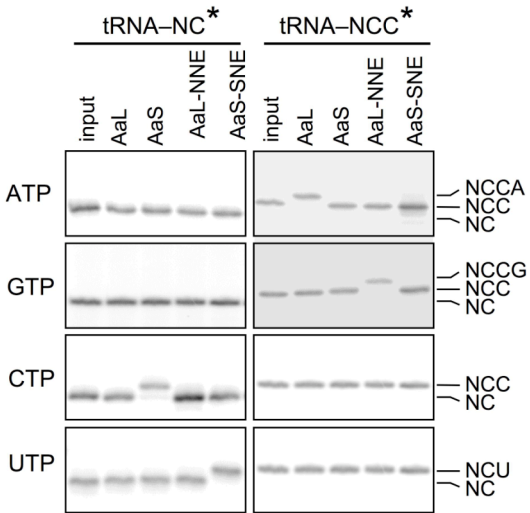

**B**

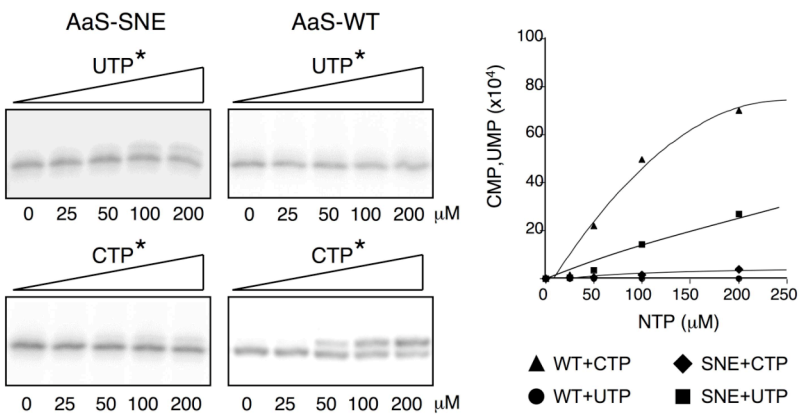

**C**

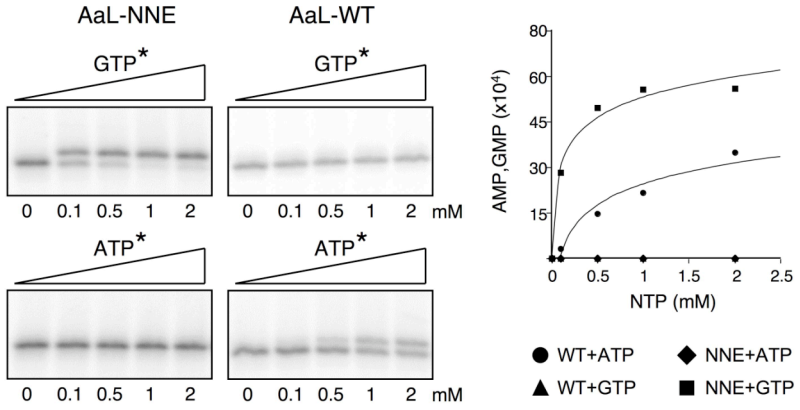

Supplement: pnas_0606961104_3.pdf [file pnas_0606961104_3.pdf]
